# Supplementary material
Source: Springer Nature journal article supplement (https://www.springermedizin.de/resource/supplementary/12904_2013_192_MOESM1_ESM.pdf/9517746)

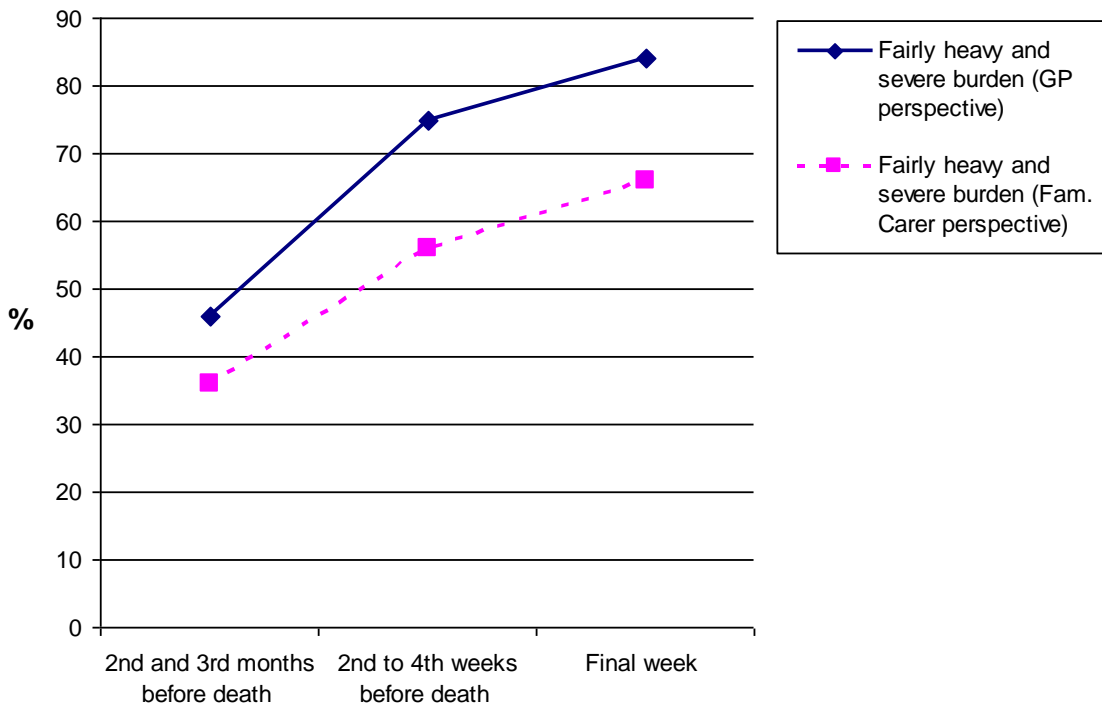

Supplement: MOESM1 [file 9517746]
